# Supplementary material
Source: PubMed Central journal article supplement (PMC3956590)

## SUPPLEMENTAL MATERIALS

### **Ultrafast hydrogen exchange reveals specific structural events during the initial stages of folding of cytochrome *c***

Hossein Fazelinia, Ming Xu, Hong Cheng, and Heinrich Roder\*

Fox Chase Cancer Center, Philadelphia, PA 19111

\* Corresponding author: [heinrich.roder@fcc.edu](mailto:heinrich.roder@fcc.edu)

**Figure S1. Competition between D-H exchange and folding at a competition time of 140  $\mu$ s as a function of labeling pH (22  $^{\circ}$ C) for the complete set of amide protons in cyt *c* observable in 2D HSQC NMR spectra (panels A through C). Solid lines represent least-squares fits of Eq. 1.**

**A**

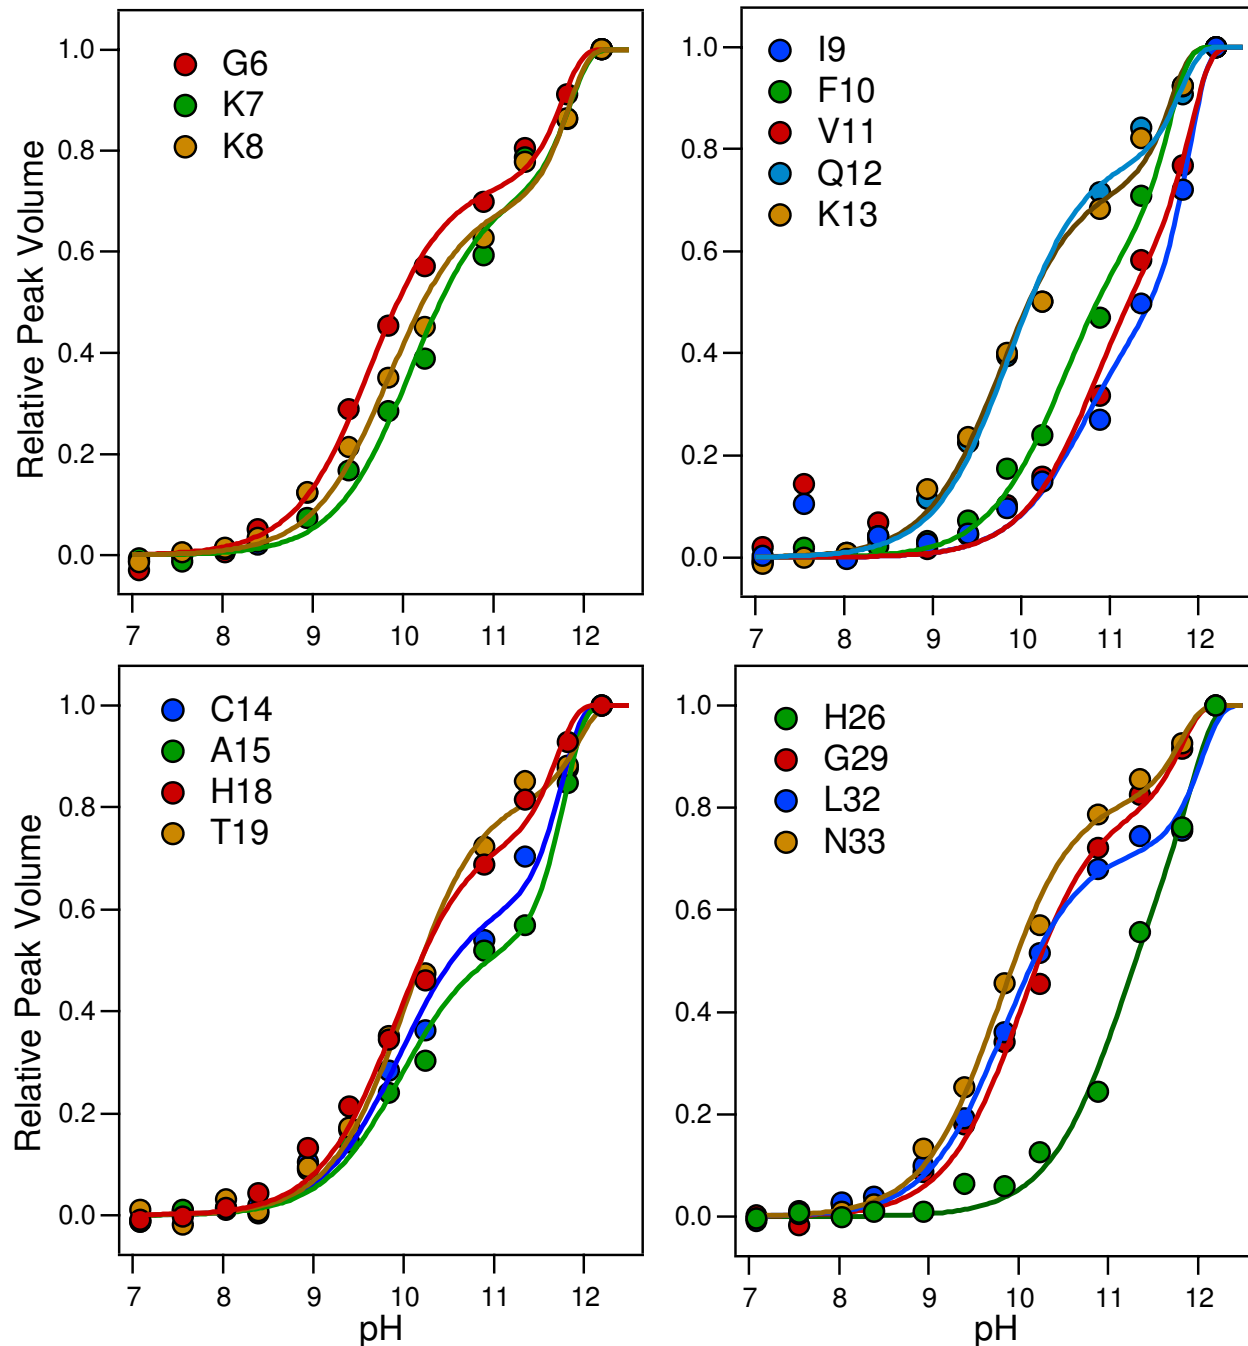

**B**

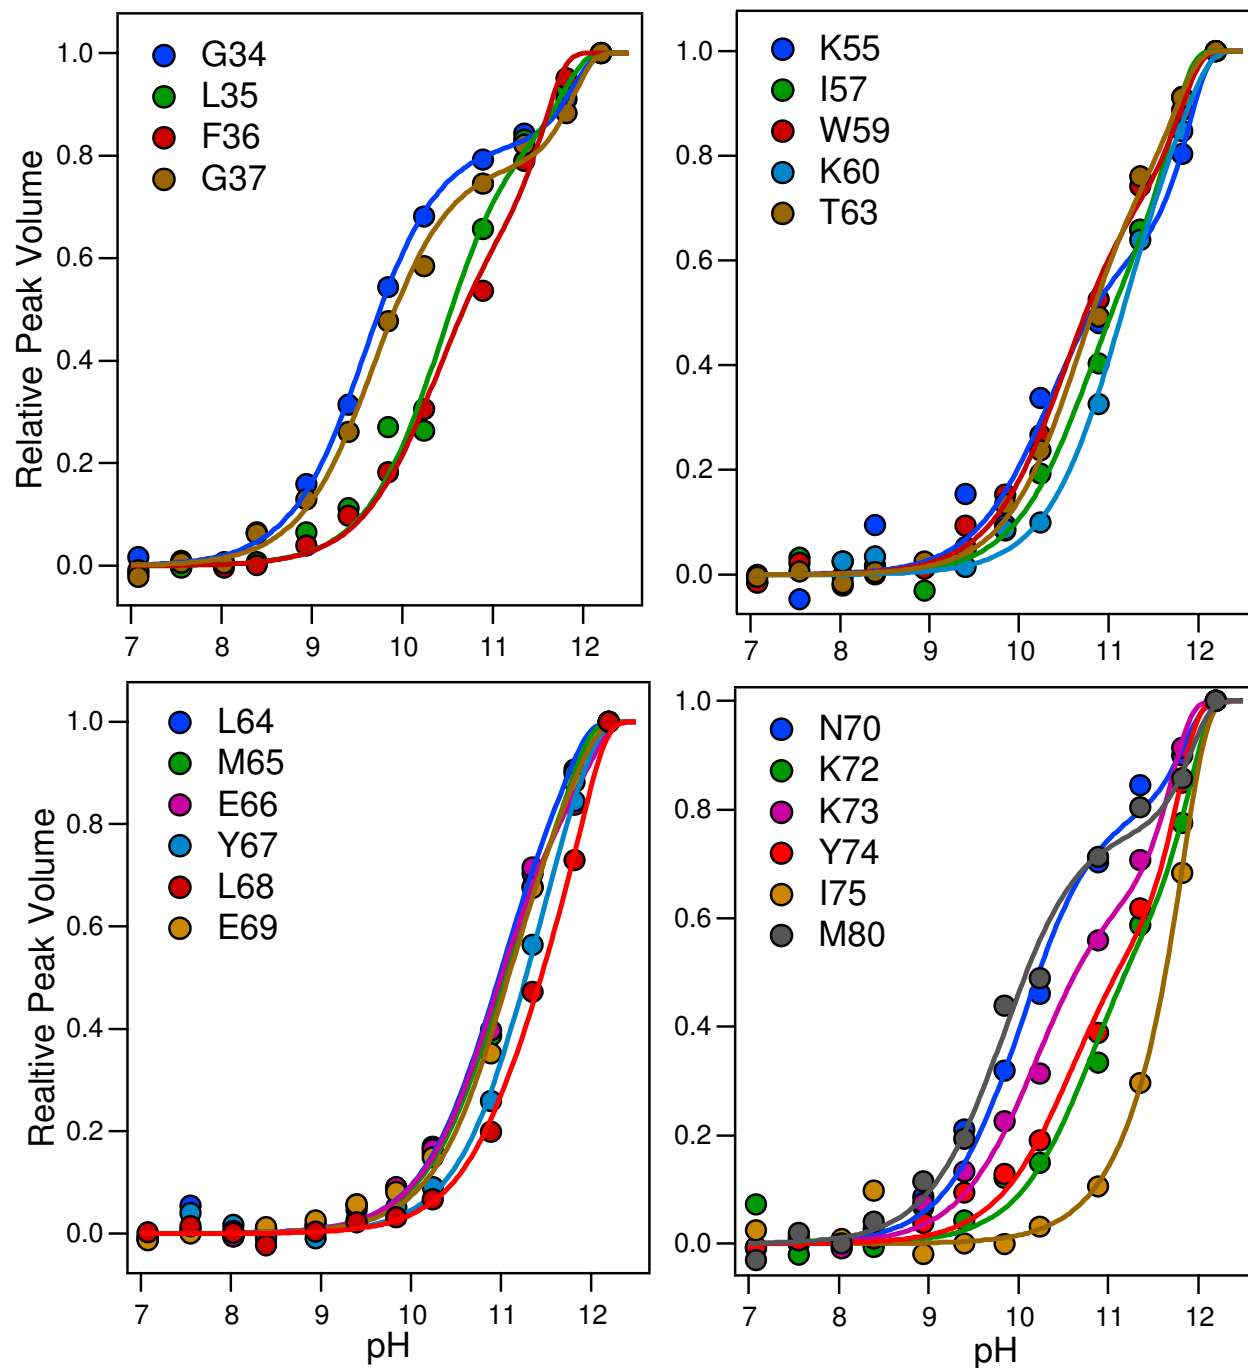

C

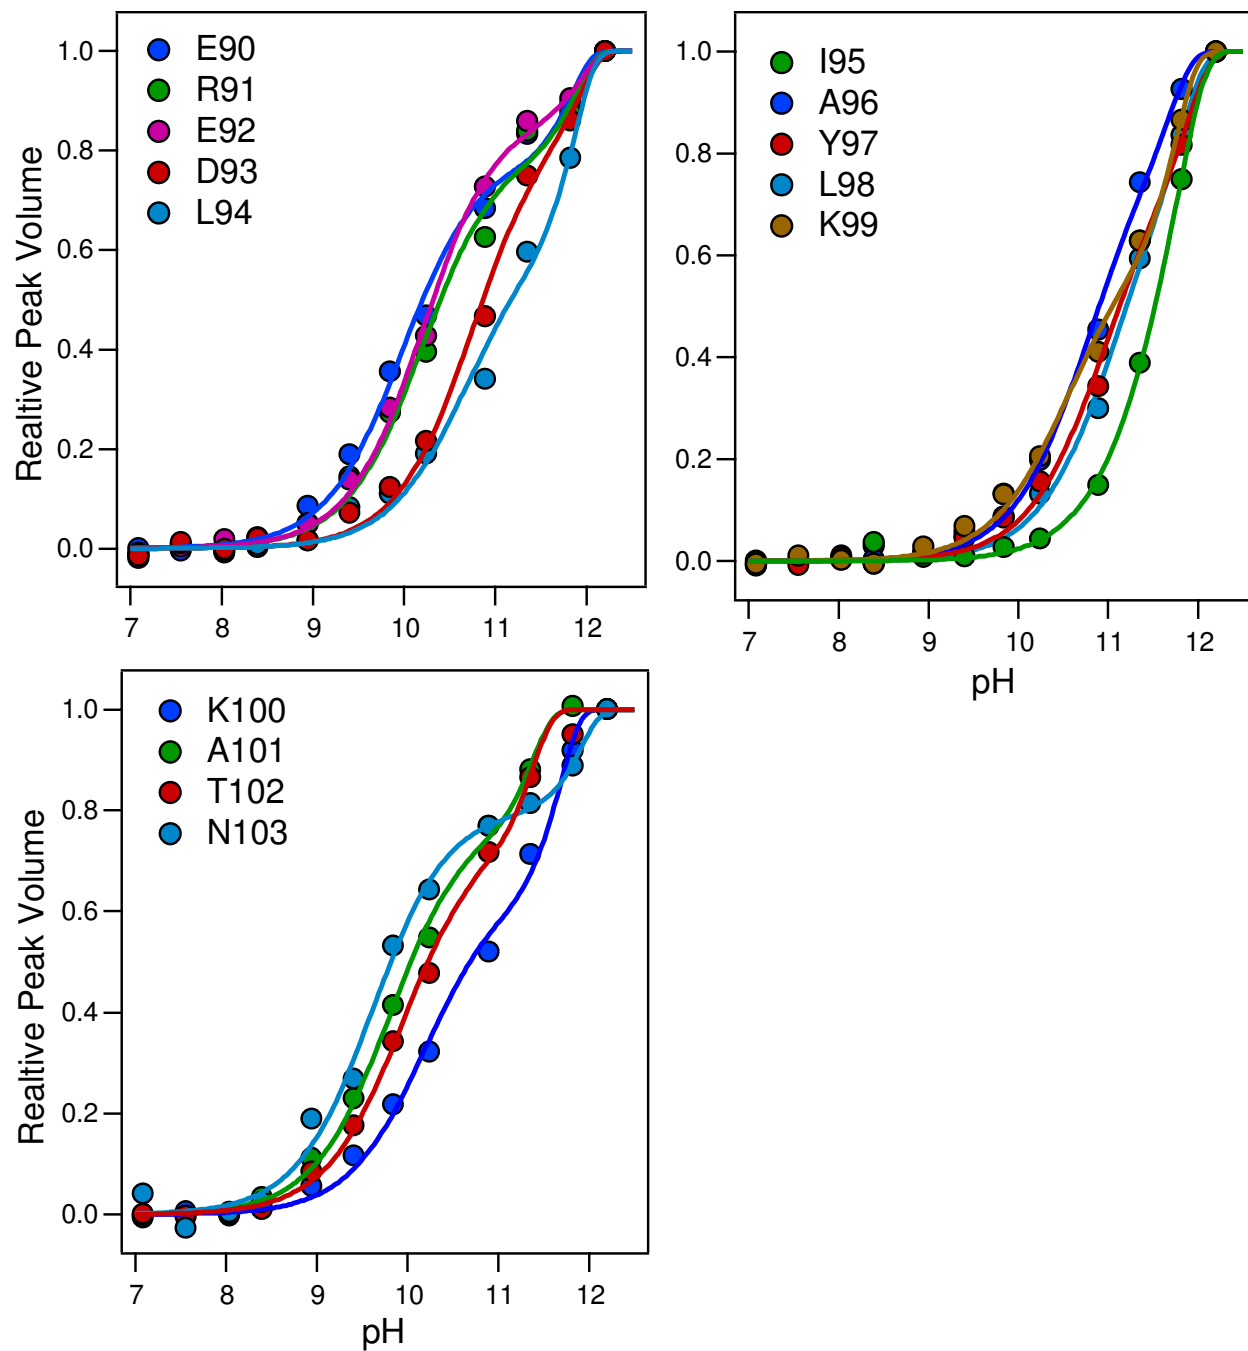

## Figure S2. Folding kinetics of horse cyt *c* at alkaline pH.

Panels **A** and **B** show kinetic traces for refolding of acid-unfolded cyt *c* (pH 2) at different pH values (4.9 to 12) measured by continuous-flow fluorescence at 22 °C, using the heme-induced quenching of Trp59 fluorescence as a probe to observe chain condensation. Double-exponential fits of the data in panel **A** yield rate constants of  $2,700 \pm 700 \text{ s}^{-1}$  and  $33,000 \pm 4,000 \text{ s}^{-1}$  with no systematic dependence on pH. The rate of the fast phase, which is dominant above pH 10 (panel **B**) increases slightly at alkaline pH and levels off at  $\sim 50,000 \text{ s}^{-1}$  above pH 11. In panel **C** the amplitude of the initial collapse phase is plotted vs. pH over the range between 11 and 13 (circles). The loss in amplitude of this pH-independent process ( $\tau = 20 \mu\text{s}$ ) is attributed to alkaline unfolding of the *I*-state, which follows a cooperative transition with an apparent  $\text{pK}_a$  of 12.1 and a Hill coefficient of 2 (solid green line). The dashed blue line shows the pH-dependent rate constant for unfolding of the *I*-state calculated from the equilibrium constant  $K_{\text{UI}}$  and the rate constant  $k_{\text{UI}} = 50,000 \text{ s}^{-1}$ .

At alkaline pH oxidized cytochrome *c* is known to undergo a conformational change from the native structure to a native-like alkaline state in which the Met80 heme ligand is replaced by a deprotonated lysine side chain (Lys72, 73 and 79 are the most likely candidates).<sup>1-4</sup> Depending on conditions the  $\text{pK}_a$  of the alkaline transition lies between 8.5 and 10.5. Our observation that the kinetics of folding is essentially independent of pH over the range from 7.8 to 10.8 indicates that any formation of a non-native lysine ligand has no measurable effect on early stages of folding.

- (1) Theorell, H.; Akesson, A. J. Am. Chem. Soc. 1941, **63**, 1818.
- (2) Pearce, L. L.; Gartner, A. L.; Smith, M.; Mauk, A. G. Biochemistry 1989, **28**, 3152.
- (3) Pollock, W. B. R.; Rosell, F. I.; Twitchett, M. B.; Dumont, M. E.; Mauk, A. G. Biochemistry 1998, **37**, 6124.
- (4) Assfalg, M.; Bertini, I.; Dolfi, A.; Turano, P.; Mauk, A. G.; Rosell, F. I.; Gray, H. B. J. Am. Chem. Soc. 2003, **125**, 2913.

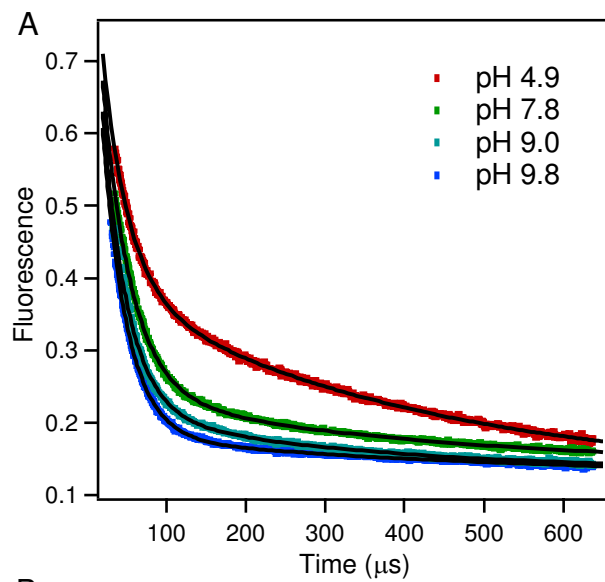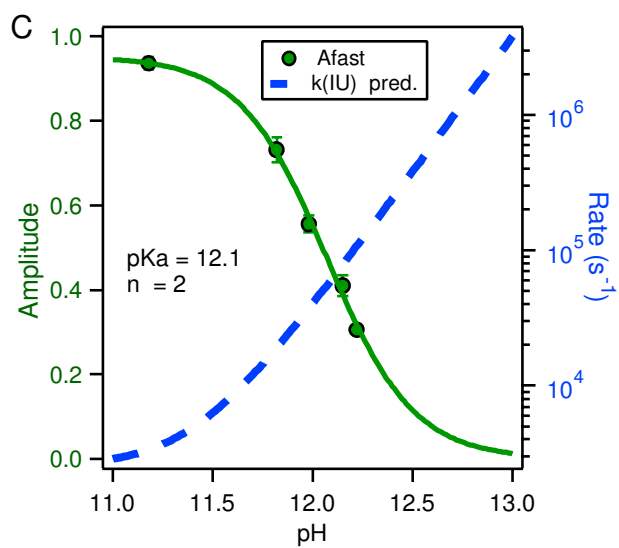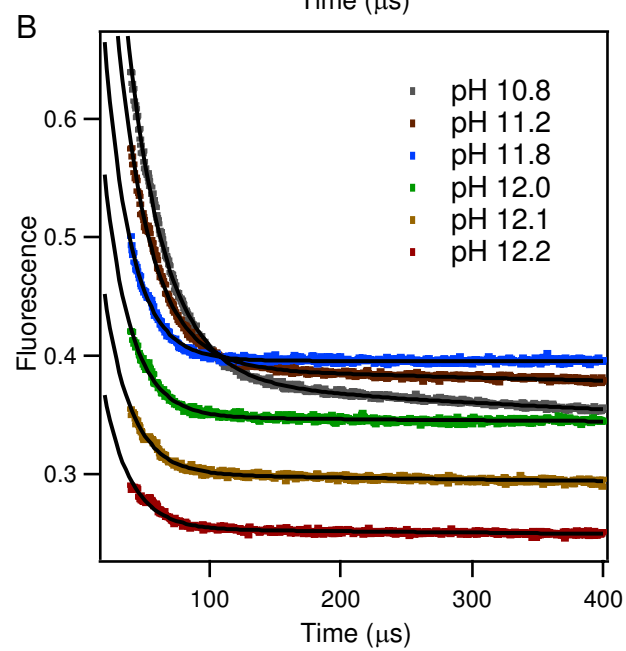

**Figure S3. Competition between D-H exchange and folding of *cyt c* as a function of competition time** at pH 9.8, 22 °C, for the complete set of amide protons in *cyt c* observable in 2D HSQC NMR spectra (panels A through C). Solid lines represent least-squares fits of Eq. 2.

A

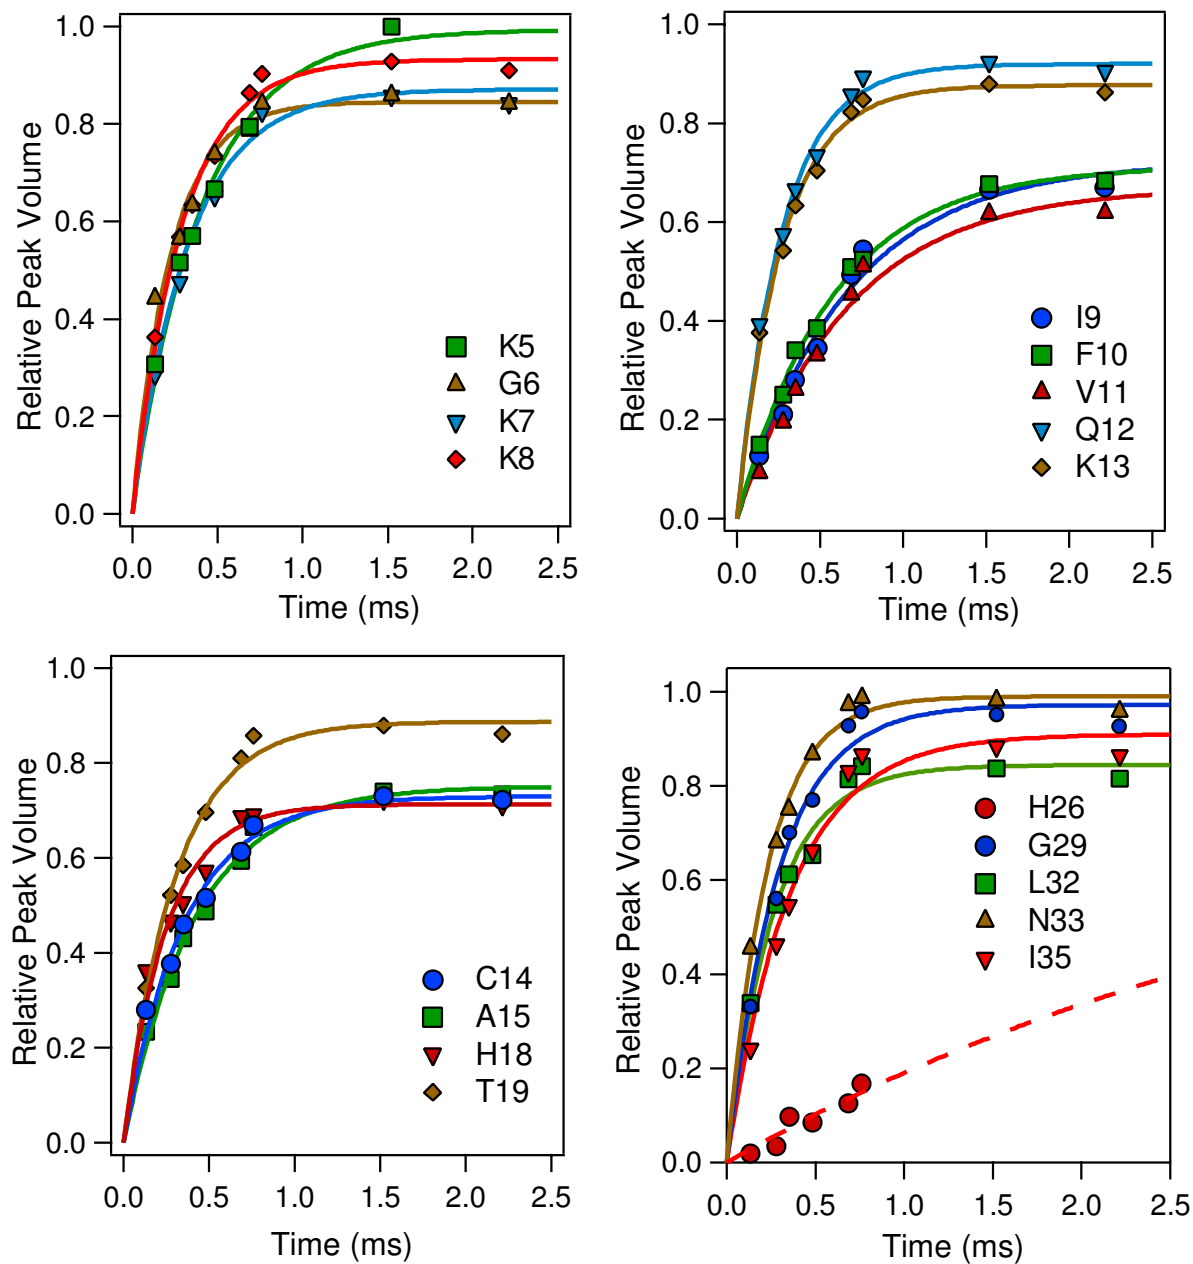

**B**

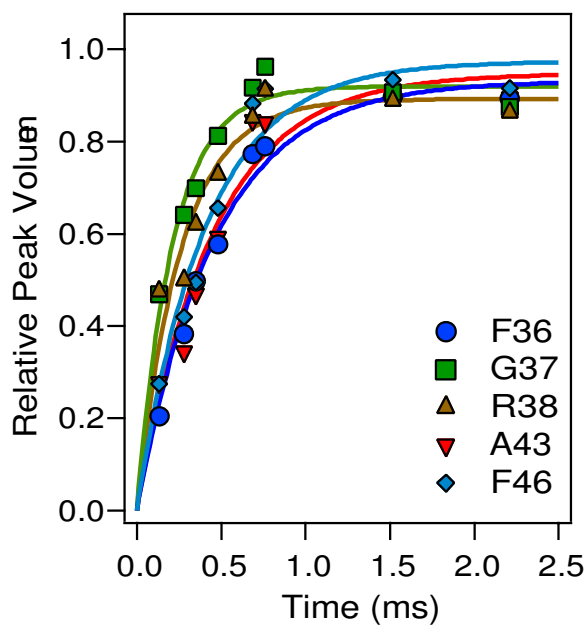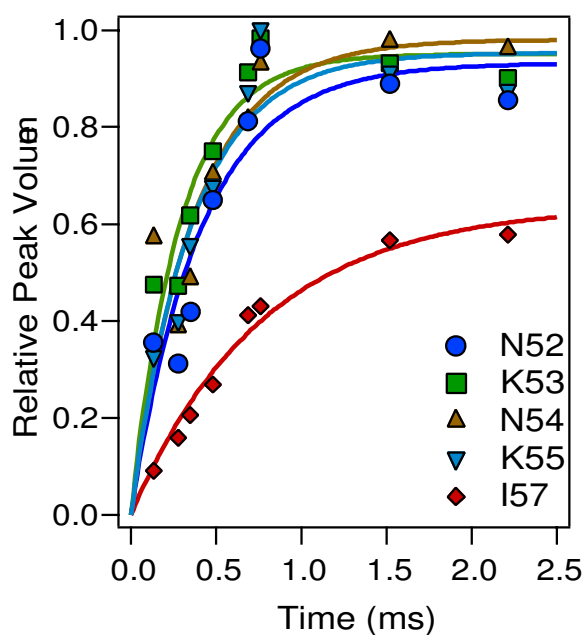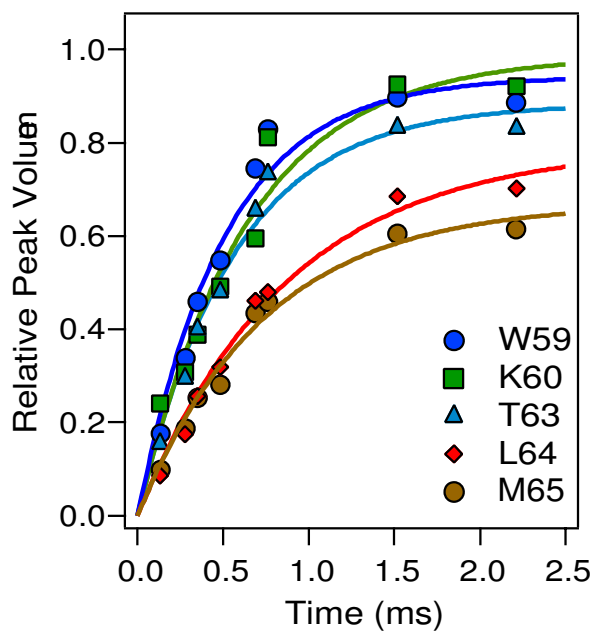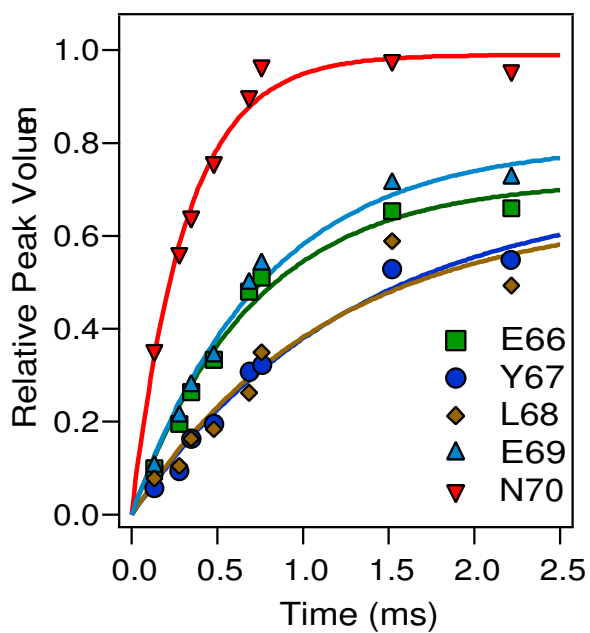



C

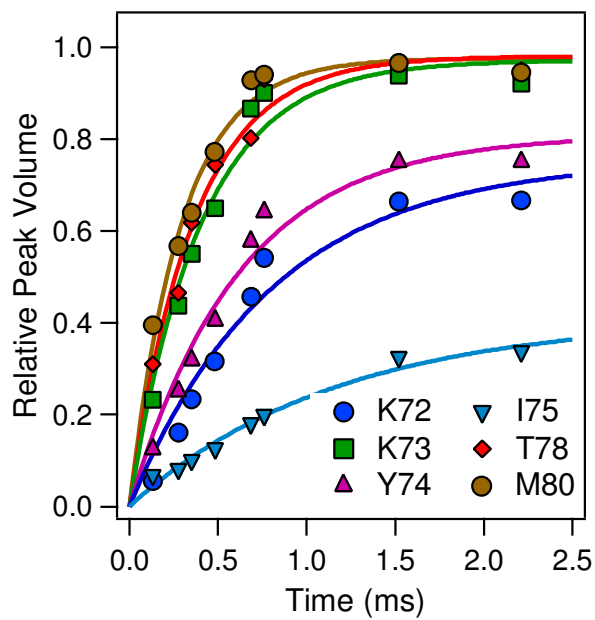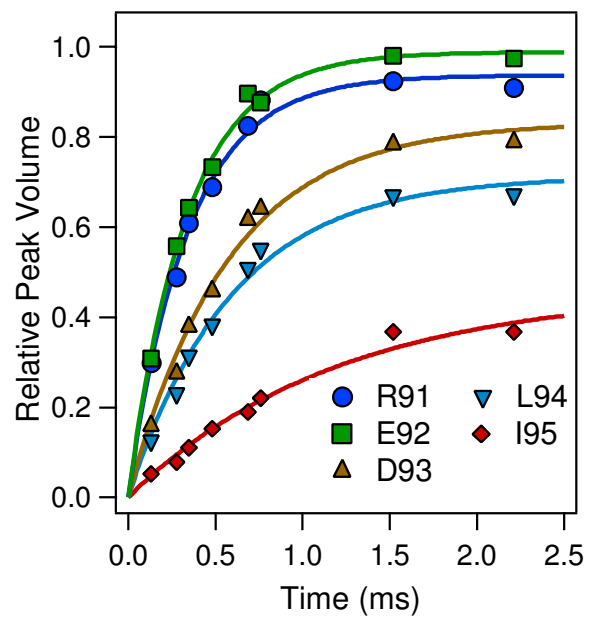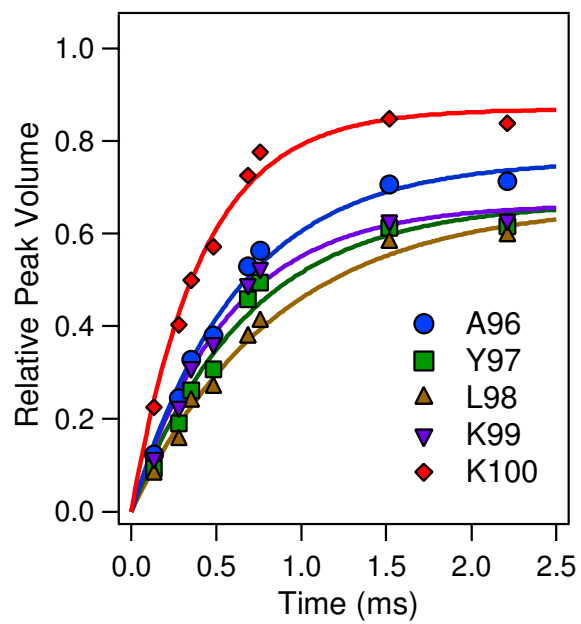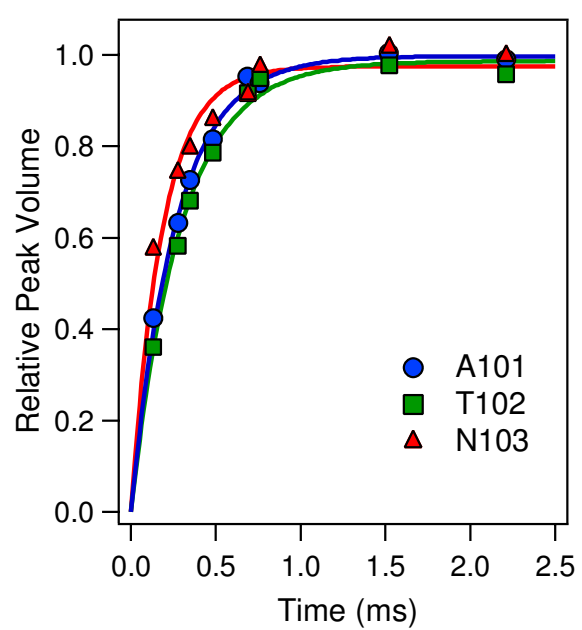

Supplement: NIHMS552756-supplement-1_si_001.pdf [file NIHMS552756-supplement-1_si_001.pdf]
